# Supplementary material for: Detecting cathepsin activity in human osteoarthritis via activity-based probes
Source: PubMed Central journal article supplement (PMC4415352; doi:10.1186/s13075-015-0586-5), 2015-03-20
Supplement: 13075_2015_586_MOESM1_ESM.pdf [file 13075_2015_586_MOESM1_ESM.pdf]

## Supplementary Data 1.

Cath      B      K      S

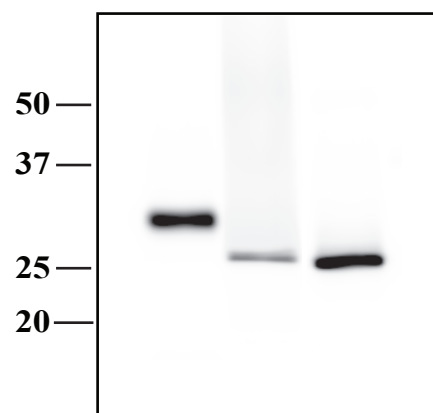

Labeling of recombinant cathepsins

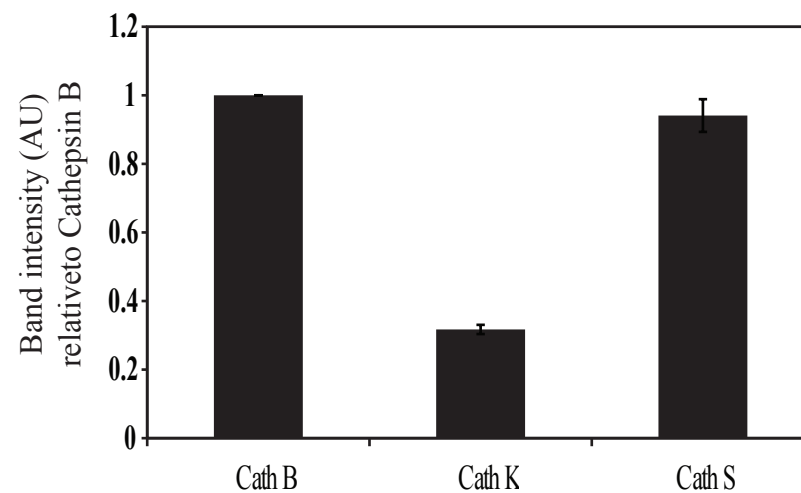

### Supplementary data 1.

Recombinant human cathepsins (final  $0.5\mu\text{M}$  active enzyme per lane; Ref 33), were diluted with acetate buffer and labeled with  $1\mu\text{M}$  of GB123 for 1 hour at  $37^{\circ}\text{C}$ . Reaction was stopped by adding sample buffer and boiling the samples at  $95^{\circ}\text{C}$  for 5 min. Samples were loaded on a 12.5% SDS PAGE gel and scanned with a Typhoon scanner as in Figure 1.
