# Supplementary material for: Detecting cathepsin activity in human osteoarthritis via activity-based probes
Source: PubMed Central journal article supplement (PMC4415352; doi:10.1186/s13075-015-0586-5), 2015-03-20
Supplement: 13075_2015_586_MOESM2_ESM.pdf [file 13075_2015_586_MOESM2_ESM.pdf]

## Supplementary Data 2.

### Synovial Fluid labeled with GB123

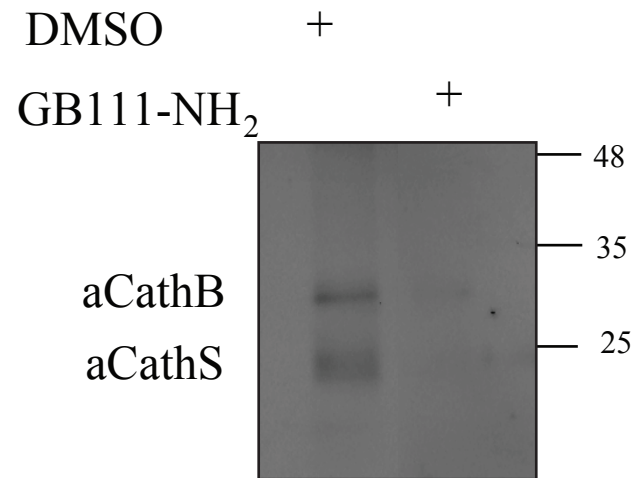

#### Supplementary Data 2.

Five  $\mu\text{L}$  of OA synovial fluid were diluted in acetate buffer 1:1 and passed through a syringe with needles 21G, 27G, 30G. Samples were then filtered through a 50kDa cutoff amicon and spun at 14000g at 18<sup>o</sup>C for 30min. Samples were treated with DMSO vehicle or 10 $\mu\text{M}$  GB111-NH<sub>2</sub> cathepsin inhibitor (34), for an hour at 37<sup>o</sup>C. After pretreatment, the samples were labeled with 5  $\mu\text{M}$  GB123 for one hour at 37<sup>o</sup>C. Reaction was stopped by adding 4 x sample buffer and boiled for 10 min. Samples were separated on a 12.5 % SDS PAGE and scanned for Cy5 fluorescence with a Typhoon scanner.
